# Supplementary material for: Minimally Invasive Electrochemical Patch-Based Sensor System for Monitoring Glucose and Lactate in the Human Body—A Survey-Based Analysis of the End-User’s Perspective
Source: PubMed Central journal article supplement (PMC7601713; doi:10.3390/s20205761), 2020-10-11
Supplement: sensors-20-05761-s001.pdf [file sensors-20-05761-s001.pdf]

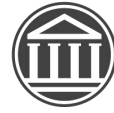

## 1. Anthropometric and sociodemographic data

|                                                                                                                                                          |                                                                                                                                                                                                                                                                                                                                                                                                       |                  |
|----------------------------------------------------------------------------------------------------------------------------------------------------------|-------------------------------------------------------------------------------------------------------------------------------------------------------------------------------------------------------------------------------------------------------------------------------------------------------------------------------------------------------------------------------------------------------|------------------|
| Age: _____ years                                                                                                                                         | Size: _____ cm                                                                                                                                                                                                                                                                                                                                                                                        | Weight: _____ kg |
| Gender: <input type="checkbox"/> female <input type="checkbox"/> male <input type="checkbox"/> diverse                                                   | Profession: _____                                                                                                                                                                                                                                                                                                                                                                                     |                  |
| What is your highest level of education?                                                                                                                 | <input type="checkbox"/> school completed, without graduation<br><input type="checkbox"/> secondary school certificate<br><input type="checkbox"/> secondary school leaving certificate<br><input type="checkbox"/> A-levels (or university entrance qualification)<br><input type="checkbox"/> university degree (Bachelor, Master)<br><input type="checkbox"/> academic title (Dr., PhD, Prof. Dr.) |                  |
| What is your monthly net income?                                                                                                                         | <input type="checkbox"/> less than 1000 EUR<br><input type="checkbox"/> 1000 EUR - 2000 EUR<br><input type="checkbox"/> 2000 EUR - 3000 EUR<br><input type="checkbox"/> 3000 EUR - 4000 EUR<br><input type="checkbox"/> more than 4000 EUR<br><input type="checkbox"/> no response                                                                                                                    |                  |
| How would you rate yourself?                                                                                                                             | <input type="checkbox"/> elite athlete<br><input type="checkbox"/> recreational athlete<br><input type="checkbox"/> non-active person                                                                                                                                                                                                                                                                 |                  |
| Do you work as a trainer/sports coach?                                                                                                                   | <input type="checkbox"/> yes <input type="checkbox"/> no                                                                                                                                                                                                                                                                                                                                              |                  |
| How many hours a week do you perform physical exercise?                                                                                                  | _____ hours / week                                                                                                                                                                                                                                                                                                                                                                                    |                  |
| How would you rate your diet?                                                                                                                            | <input type="checkbox"/> healthy diet<br><input type="checkbox"/> partly healthy, partly unhealthy<br><input type="checkbox"/> unhealthy diet                                                                                                                                                                                                                                                         |                  |
| Do you smoke?                                                                                                                                            | <input type="checkbox"/> yes <input type="checkbox"/> no                                                                                                                                                                                                                                                                                                                                              |                  |
| Have you been diagnosed with diabetes mellitus?                                                                                                          | <input type="checkbox"/> no <input type="checkbox"/> type 2 insulin-dependent<br><input type="checkbox"/> type 1 <input type="checkbox"/> type 2 non-insulin-dependent<br><input type="checkbox"/> other type (e.g. gestational diabetes)                                                                                                                                                             |                  |
| Do you have any experience with lactate measurements?                                                                                                    | <input type="checkbox"/> yes <input type="checkbox"/> no                                                                                                                                                                                                                                                                                                                                              |                  |
| Do you have any experience with lactate measurements on other people?                                                                                    | <input type="checkbox"/> yes <input type="checkbox"/> no                                                                                                                                                                                                                                                                                                                                              |                  |
| <b>If you answered yes to either of the last two questions (otherwise, please skip this question):</b><br>How often do you perform lactate measurements? | <input type="checkbox"/> daily<br><input type="checkbox"/> weekly, but not every day<br><input type="checkbox"/> several times a month, but not every week<br><input type="checkbox"/> once a month<br><input type="checkbox"/> less than once a month                                                                                                                                                |                  |

|                                                                                                                                                   |                                                                                                                                                                                                                                                        |
|---------------------------------------------------------------------------------------------------------------------------------------------------|--------------------------------------------------------------------------------------------------------------------------------------------------------------------------------------------------------------------------------------------------------|
| Do you use blood glucose test strips to monitor/control your blood glucose?                                                                       | <input type="checkbox"/> yes <input type="checkbox"/> no                                                                                                                                                                                               |
| Do you use blood glucose test strips to monitor/control other people's blood glucose?                                                             | <input type="checkbox"/> yes <input type="checkbox"/> no                                                                                                                                                                                               |
| <b>If you answered yes to either of the last two questions (otherwise, please skip this question):</b><br>How often do you measure blood glucose? | <input type="checkbox"/> daily<br><input type="checkbox"/> weekly, but not every day<br><input type="checkbox"/> several times a month, but not every week<br><input type="checkbox"/> once a month<br><input type="checkbox"/> less than once a month |
| Do you use continuous blood glucose measurement systems (e.g. Freestyle Libre2, Dexcom G6, Enlite, etc.)?<br>NOT blood glucose test strips!       | <input type="checkbox"/> yes <input type="checkbox"/> no                                                                                                                                                                                               |

### **Brief description of the project - Please read the following information carefully!**

Within the scope of the EU-funded project "ELSAH", a patch for the minimally-invasive measurement of biomolecules in the human body (especially glucose and lactate) is being developed. The use of this patch is painless.

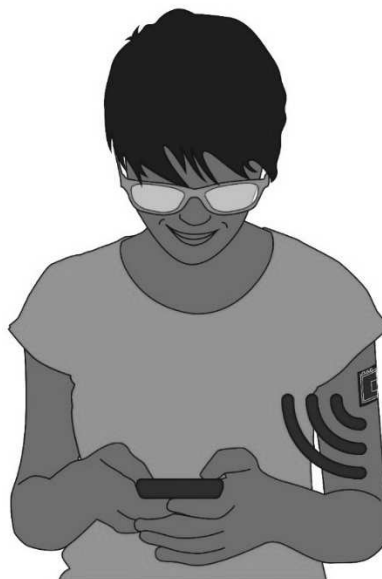

Figure: ELSAH-patch for the measurement of biomolecules

Monitoring your glucose concentration using the ELSAH-patch could help you detect diabetes mellitus at an early stage, or in case of existing diabetes mellitus, to regulate your blood sugar concentration. Measuring lactate using the patch could help you determine your fitness level and/or identify your optimal intensity zone for your physical exercises. The patch can communicate wirelessly with your mobile phone (in combination with a software (app) on your mobile phone). No complex calibration process is required. Glucose and lactate values are continuously recorded at regular intervals. The patch can be disposed together with household waste. There are no risks/hazards for the user during its application.



## 2. User behavior/User acceptance

|                                                                                                                                                          | strongly agree                                                                                                                                                                                                                                                                                                                  | agree                                          | neutral                                            | disagree                                     | strongly disagree                              |
|----------------------------------------------------------------------------------------------------------------------------------------------------------|---------------------------------------------------------------------------------------------------------------------------------------------------------------------------------------------------------------------------------------------------------------------------------------------------------------------------------|------------------------------------------------|----------------------------------------------------|----------------------------------------------|------------------------------------------------|
| I have a personal need for such a product.                                                                                                               | <input type="checkbox"/>                                                                                                                                                                                                                                                                                                        | <input type="checkbox"/>                       | <input type="checkbox"/>                           | <input type="checkbox"/>                     | <input type="checkbox"/>                       |
| There is a general need for such a product.                                                                                                              | <input type="checkbox"/>                                                                                                                                                                                                                                                                                                        | <input type="checkbox"/>                       | <input type="checkbox"/>                           | <input type="checkbox"/>                     | <input type="checkbox"/>                       |
| If you belong to one of the following professions: sports scientist, trainer, doctor:<br>I would apply the ELSAH-patch system to others.                 | <input type="checkbox"/>                                                                                                                                                                                                                                                                                                        | <input type="checkbox"/>                       | <input type="checkbox"/>                           | <input type="checkbox"/>                     | <input type="checkbox"/>                       |
| Sustainability (recycling, resource-saving production, etc.) would be a decisive criterion for me to buy the ELSAH-patch system.                         | <input type="checkbox"/>                                                                                                                                                                                                                                                                                                        | <input type="checkbox"/>                       | <input type="checkbox"/>                           | <input type="checkbox"/>                     | <input type="checkbox"/>                       |
| In which situations would you apply the ELSAH-patch system yourself?<br>Multiple answers possible!                                                       | <input type="checkbox"/> fitness tests<br><input type="checkbox"/> during training (e.g. for training control)<br><input type="checkbox"/> health-related use (e.g. early warning of diabetes mellitus)<br><input type="checkbox"/> in dealing with diseases (e.g. diabetes mellitus)<br><input type="checkbox"/> others: _____ |                                                |                                                    |                                              |                                                |
| How often would you use the ELSAH-patch system for lactate measurements, regardless of its price?                                                        | constantly (daily)<br><input type="checkbox"/>                                                                                                                                                                                                                                                                                  | regularly (weekly)<br><input type="checkbox"/> | occasionally (monthly)<br><input type="checkbox"/> | rarely (yearly)<br><input type="checkbox"/>  | never<br><input type="checkbox"/>              |
| How often would you use the ELSAH-patch system for glucose measurements, regardless of its price?                                                        | constantly (daily)<br><input type="checkbox"/>                                                                                                                                                                                                                                                                                  | regularly (weekly)<br><input type="checkbox"/> | occasionally (monthly)<br><input type="checkbox"/> | rarely (yearly)<br><input type="checkbox"/>  | never<br><input type="checkbox"/>              |
| Please answer only if you have been regularly measuring your lactate and/or glucose values:<br>How would you rate the level of pain during measurements? | extremely painful<br><input type="checkbox"/>                                                                                                                                                                                                                                                                                   | very painful<br><input type="checkbox"/>       | painful<br><input type="checkbox"/>                | slightly painful<br><input type="checkbox"/> | not at all painful<br><input type="checkbox"/> |
| To what extent did the pain of using conventional systems prevent you from voluntarily measuring your lactate and/or glucose values?                     | very great extent<br><input type="checkbox"/>                                                                                                                                                                                                                                                                                   | great extent<br><input type="checkbox"/>       | some extent<br><input type="checkbox"/>            | little extent<br><input type="checkbox"/>    | not at all<br><input type="checkbox"/>         |
| Have you ever had any allergic reaction when wearing patches?                                                                                            | <input type="checkbox"/> yes <input type="checkbox"/> no                                                                                                                                                                                                                                                                        |                                                |                                                    |                                              |                                                |
| <b>If yes</b> , what brand / type triggered the allergic reaction?                                                                                       | <input type="checkbox"/> following product: _____<br><input type="checkbox"/> can't remember                                                                                                                                                                                                                                    |                                                |                                                    |                                              |                                                |

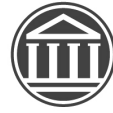

### 3. Technical aspects and design

|                                                                                                                                                   |                                                                                                                                                                                                                                                                                                                                                                                                                                                                                                                                                                                                                                                                                                                                                                                                                                                                                 |                                                                                                               |                                                                                                                |                                                                                                               |                                                                                                                |                                                                                                               |                                                                                                                |                                       |                          |                          |                          |
|---------------------------------------------------------------------------------------------------------------------------------------------------|---------------------------------------------------------------------------------------------------------------------------------------------------------------------------------------------------------------------------------------------------------------------------------------------------------------------------------------------------------------------------------------------------------------------------------------------------------------------------------------------------------------------------------------------------------------------------------------------------------------------------------------------------------------------------------------------------------------------------------------------------------------------------------------------------------------------------------------------------------------------------------|---------------------------------------------------------------------------------------------------------------|----------------------------------------------------------------------------------------------------------------|---------------------------------------------------------------------------------------------------------------|----------------------------------------------------------------------------------------------------------------|---------------------------------------------------------------------------------------------------------------|----------------------------------------------------------------------------------------------------------------|---------------------------------------|--------------------------|--------------------------|--------------------------|
| <p>The ELSAH patch should be able to transfer the data to a ...<br/>Multiple answers possible!</p>                                                | <input type="checkbox"/> smartphone<br><input type="checkbox"/> tablet<br><input type="checkbox"/> PC<br><input type="checkbox"/> wearable (smartwatch, fitness tracker, etc.)<br><input type="checkbox"/> other: _____                                                                                                                                                                                                                                                                                                                                                                                                                                                                                                                                                                                                                                                         |                                                                                                               |                                                                                                                |                                                                                                               |                                                                                                                |                                                                                                               |                                                                                                                |                                       |                          |                          |                          |
| <p>Where on the body would you say is the best place to apply the patch?<br/>Please choose <b>one</b> option!</p>                                 | <input type="checkbox"/> forearm<br><input type="checkbox"/> upper arm<br><input type="checkbox"/> abdomen<br><input type="checkbox"/> back<br><input type="checkbox"/> not relevant<br><input type="checkbox"/> upper leg<br><input type="checkbox"/> lower leg<br><input type="checkbox"/> neck<br><input type="checkbox"/> buttocks                                                                                                                                                                                                                                                                                                                                                                                                                                                                                                                                          |                                                                                                               |                                                                                                                |                                                                                                               |                                                                                                                |                                                                                                               |                                                                                                                |                                       |                          |                          |                          |
| <p>For your application: how quickly does the system have to be ready-to-use (from the time the patch is applied to the first valid reading)?</p> | <input type="checkbox"/> immediately<br><input type="checkbox"/> within 30 minutes<br><input type="checkbox"/> within 1 hour<br><input type="checkbox"/> within 2 hours<br><input type="checkbox"/> not relevant                                                                                                                                                                                                                                                                                                                                                                                                                                                                                                                                                                                                                                                                |                                                                                                               |                                                                                                                |                                                                                                               |                                                                                                                |                                                                                                               |                                                                                                                |                                       |                          |                          |                          |
| <p>For your application: at what intervals should the ELSAH-patch system provide data?</p>                                                        | <input type="checkbox"/> every minute<br><input type="checkbox"/> every 5 minutes<br><input type="checkbox"/> every 15 minutes<br><input type="checkbox"/> every 30 minutes<br><input type="checkbox"/> not relevant                                                                                                                                                                                                                                                                                                                                                                                                                                                                                                                                                                                                                                                            |                                                                                                               |                                                                                                                |                                                                                                               |                                                                                                                |                                                                                                               |                                                                                                                |                                       |                          |                          |                          |
| <p>For your application: for how long should the ELSAH-patch system be able to operate?</p>                                                       | <input type="checkbox"/> less than 12 hours<br><input type="checkbox"/> 12 hours<br><input type="checkbox"/> 24 hours<br><input type="checkbox"/> several days<br><input type="checkbox"/> more than one week                                                                                                                                                                                                                                                                                                                                                                                                                                                                                                                                                                                                                                                                   |                                                                                                               |                                                                                                                |                                                                                                               |                                                                                                                |                                                                                                               |                                                                                                                |                                       |                          |                          |                          |
| <p>A 24-hour patch lifetime would be sufficient for my application.</p>                                                                           | <table border="0"> <tr> <td>strongly agree</td> <td>agree</td> <td>neutral</td> <td>disagree</td> <td>strongly disagree</td> </tr> <tr> <td><input type="checkbox"/></td> <td><input type="checkbox"/></td> <td><input type="checkbox"/></td> <td><input type="checkbox"/></td> <td><input type="checkbox"/></td> </tr> </table>                                                                                                                                                                                                                                                                                                                                                                                                                                                                                                                                                | strongly agree                                                                                                | agree                                                                                                          | neutral                                                                                                       | disagree                                                                                                       | strongly disagree                                                                                             | <input type="checkbox"/>                                                                                       | <input type="checkbox"/>              | <input type="checkbox"/> | <input type="checkbox"/> | <input type="checkbox"/> |
| strongly agree                                                                                                                                    | agree                                                                                                                                                                                                                                                                                                                                                                                                                                                                                                                                                                                                                                                                                                                                                                                                                                                                           | neutral                                                                                                       | disagree                                                                                                       | strongly disagree                                                                                             |                                                                                                                |                                                                                                               |                                                                                                                |                                       |                          |                          |                          |
| <input type="checkbox"/>                                                                                                                          | <input type="checkbox"/>                                                                                                                                                                                                                                                                                                                                                                                                                                                                                                                                                                                                                                                                                                                                                                                                                                                        | <input type="checkbox"/>                                                                                      | <input type="checkbox"/>                                                                                       | <input type="checkbox"/>                                                                                      |                                                                                                                |                                                                                                               |                                                                                                                |                                       |                          |                          |                          |
| <p>What patch shape would you prefer?<br/>Please choose <b>one</b> option!</p>                                                                    | <table border="0"> <tr> <td><input type="checkbox"/> </td> <td><input type="checkbox"/> </td> </tr> <tr> <td><input type="checkbox"/> </td> <td><input type="checkbox"/> </td> </tr> <tr> <td><input type="checkbox"/> </td> <td><input type="checkbox"/> </td> </tr> <tr> <td colspan="2"><input type="checkbox"/> not relevant</td> </tr> </table> | <input type="checkbox"/>  | <input type="checkbox"/>  | <input type="checkbox"/>  | <input type="checkbox"/>  | <input type="checkbox"/>  | <input type="checkbox"/>  | <input type="checkbox"/> not relevant |                          |                          |                          |
| <input type="checkbox"/>                                      | <input type="checkbox"/>                                                                                                                                                                                                                                                                                                                                                                                                                                                                                                                                                                                                                                                                                                                                                                   |                                                                                                               |                                                                                                                |                                                                                                               |                                                                                                                |                                                                                                               |                                                                                                                |                                       |                          |                          |                          |
| <input type="checkbox"/>                                      | <input type="checkbox"/>                                                                                                                                                                                                                                                                                                                                                                                                                                                                                                                                                                                                                                                                                                                                                                   |                                                                                                               |                                                                                                                |                                                                                                               |                                                                                                                |                                                                                                               |                                                                                                                |                                       |                          |                          |                          |
| <input type="checkbox"/>                                      | <input type="checkbox"/>                                                                                                                                                                                                                                                                                                                                                                                                                                                                                                                                                                                                                                                                                                                                                                   |                                                                                                               |                                                                                                                |                                                                                                               |                                                                                                                |                                                                                                               |                                                                                                                |                                       |                          |                          |                          |
| <input type="checkbox"/> not relevant                                                                                                             |                                                                                                                                                                                                                                                                                                                                                                                                                                                                                                                                                                                                                                                                                                                                                                                                                                                                                 |                                                                                                               |                                                                                                                |                                                                                                               |                                                                                                                |                                                                                                               |                                                                                                                |                                       |                          |                          |                          |
| <p>Which color would you prefer?<br/>Please choose <b>one</b> option!</p>                                                                         | <input type="checkbox"/> transparent<br><input type="checkbox"/> white<br><input type="checkbox"/> skin tone<br><input type="checkbox"/> colored<br><input type="checkbox"/> not relevant                                                                                                                                                                                                                                                                                                                                                                                                                                                                                                                                                                                                                                                                                       |                                                                                                               |                                                                                                                |                                                                                                               |                                                                                                                |                                                                                                               |                                                                                                                |                                       |                          |                          |                          |
| <p>What other biomarkers would you be interested in / should ELSAH be capable of measuring in the future?<br/>Multiple answers possible!</p>      | <input type="checkbox"/> inflammatory factors<br><input type="checkbox"/> hormones<br><input type="checkbox"/> oncological factors/cancer markers<br><input type="checkbox"/> marker for myocardial infarction<br><input type="checkbox"/> others: _____                                                                                                                                                                                                                                                                                                                                                                                                                                                                                                                                                                                                                        |                                                                                                               |                                                                                                                |                                                                                                               |                                                                                                                |                                                                                                               |                                                                                                                |                                       |                          |                          |                          |



#### 4. Software and data security

|                                                                                                                                              |                                                                                                                                                                                                                                                                                                                                                                                                                      |                          |                          |                           |                             |
|----------------------------------------------------------------------------------------------------------------------------------------------|----------------------------------------------------------------------------------------------------------------------------------------------------------------------------------------------------------------------------------------------------------------------------------------------------------------------------------------------------------------------------------------------------------------------|--------------------------|--------------------------|---------------------------|-----------------------------|
| <p>How should the measured values be displayed?<br/>Multiple answers possible!</p>                                                           | <input type="checkbox"/> raw data (glucose and/or lactate values)<br><input type="checkbox"/> analyzed data (notification about possible pathological alterations)<br><input type="checkbox"/> compared with reference values (trends in relation to pre-test values, reference group values)<br><input type="checkbox"/> compared with own previous measurements (trends)<br><input type="checkbox"/> others: _____ |                          |                          |                           |                             |
| <b>How important is it for you...</b>                                                                                                        | <b>very important</b>                                                                                                                                                                                                                                                                                                                                                                                                | <b>rather important</b>  | <b>neutral</b>           | <b>rather unimportant</b> | <b>not important at all</b> |
| ... that the software provides information about thresholds above which the values are considered a health risk?                             | <input type="checkbox"/>                                                                                                                                                                                                                                                                                                                                                                                             | <input type="checkbox"/> | <input type="checkbox"/> | <input type="checkbox"/>  | <input type="checkbox"/>    |
| ... that the software offers a diabetes mellitus screening test that can be performed using the ELSAH-patch system?                          | <input type="checkbox"/>                                                                                                                                                                                                                                                                                                                                                                                             | <input type="checkbox"/> | <input type="checkbox"/> | <input type="checkbox"/>  | <input type="checkbox"/>    |
| ... that the software offers a fitness test that can be performed using the ELSAH-patch system?                                              | <input type="checkbox"/>                                                                                                                                                                                                                                                                                                                                                                                             | <input type="checkbox"/> | <input type="checkbox"/> | <input type="checkbox"/>  | <input type="checkbox"/>    |
| ... that the software provides recommendations for optimal training intensity ranges (based on the fitness test)?                            | <input type="checkbox"/>                                                                                                                                                                                                                                                                                                                                                                                             | <input type="checkbox"/> | <input type="checkbox"/> | <input type="checkbox"/>  | <input type="checkbox"/>    |
| ... that the ELSAH-patch system informs you whether you are within your optimal training range during your workout?                          | <input type="checkbox"/>                                                                                                                                                                                                                                                                                                                                                                                             | <input type="checkbox"/> | <input type="checkbox"/> | <input type="checkbox"/>  | <input type="checkbox"/>    |
| ... that the ELSAH-patch system provides information about the intensity of your overall workout once you have finished it?                  | <input type="checkbox"/>                                                                                                                                                                                                                                                                                                                                                                                             | <input type="checkbox"/> | <input type="checkbox"/> | <input type="checkbox"/>  | <input type="checkbox"/>    |
| ... that the software/app can display/process other parameters (e.g. heart rate, step count, etc.) of other health-related wearable devices? | <input type="checkbox"/>                                                                                                                                                                                                                                                                                                                                                                                             | <input type="checkbox"/> | <input type="checkbox"/> | <input type="checkbox"/>  | <input type="checkbox"/>    |
| ... that the software / app informs/warns you about/of (imminent) critical blood values (hypoglycemia or hyperglycemia)?                     | <input type="checkbox"/>                                                                                                                                                                                                                                                                                                                                                                                             | <input type="checkbox"/> | <input type="checkbox"/> | <input type="checkbox"/>  | <input type="checkbox"/>    |
| ... that the software/app contains a history/diary function for the measured values?                                                         | <input type="checkbox"/>                                                                                                                                                                                                                                                                                                                                                                                             | <input type="checkbox"/> | <input type="checkbox"/> | <input type="checkbox"/>  | <input type="checkbox"/>    |
| ... that the system ensures a high level of data security/privacy?                                                                           | <input type="checkbox"/>                                                                                                                                                                                                                                                                                                                                                                                             | <input type="checkbox"/> | <input type="checkbox"/> | <input type="checkbox"/>  | <input type="checkbox"/>    |



|                                                                                                                                                | strongly agree           | agree                    | neutral                  | disagree                 | strongly disagree        |
|------------------------------------------------------------------------------------------------------------------------------------------------|--------------------------|--------------------------|--------------------------|--------------------------|--------------------------|
| A high level of data security (end-to-end encryption, encrypted data storage, etc.) would influence my decision to buy the ELSAH-patch system. | <input type="checkbox"/> | <input type="checkbox"/> | <input type="checkbox"/> | <input type="checkbox"/> | <input type="checkbox"/> |
| I would allow certain persons (e.g. family members and/or my doctor and/or trainer) to access my data (only with my explicit consent).         | <input type="checkbox"/> | <input type="checkbox"/> | <input type="checkbox"/> | <input type="checkbox"/> | <input type="checkbox"/> |

### 5. Pricing

|                                                                                                                                                                                                                                      |                                                                                                                                                                                                                                  |
|--------------------------------------------------------------------------------------------------------------------------------------------------------------------------------------------------------------------------------------|----------------------------------------------------------------------------------------------------------------------------------------------------------------------------------------------------------------------------------|
| How much money would you be willing to spend on the ELSAH-patch system per month on average (with the ability to measure both lactate and glucose)?                                                                                  | <input type="checkbox"/> less than 20 EUR<br><input type="checkbox"/> 20-100 EUR<br><input type="checkbox"/> 101-200 EUR<br><input type="checkbox"/> over 200 EUR                                                                |
| Total costs, including patches and software (based on all of the requirements you specified previously).                                                                                                                             | <input type="checkbox"/> I would not buy the ELSAH-patch system                                                                                                                                                                  |
| What is the maximum amount you would pay for a single application of an ELSAH-patch if its lifetime was 24 hours and the software (based on all of the requirements you specified previously) was free of charge?                    | <input type="checkbox"/> less than 5 EUR<br><input type="checkbox"/> 5-10 EUR<br><input type="checkbox"/> 11-15 EUR<br><input type="checkbox"/> over 15 EUR<br><input type="checkbox"/> I would not buy the ELSAH-patches        |
| If the software was not free of charge, what would be the maximum one-time fee you would pay for the software/app (based on all of the requirements you specified previously), if the patches had a final price of 15 EUR per patch? | <input type="checkbox"/> less than 5 EUR<br><input type="checkbox"/> 5-15 EUR<br><input type="checkbox"/> 16-25 EUR<br><input type="checkbox"/> over 25 EUR<br><input type="checkbox"/> I would not buy the ELSAH-patch software |

What other factors associated with the ELSAH-patch system are of relevance to you? Additional comments:

**Thank you very much for your participation!**
